# Supplementary material for: The complex evolutionary history of big-eared horseshoe bats (Rhinolophus macrotis complex): insights from genetic, morphological and acoustic data
Source: PubMed Central journal article supplement (PMC5066199; doi:10.1038/srep35417), 2016-10-17

## Supplementary Information

### **The complex evolutionary history of big-eared horseshoe bats (*Rhinolophus macrotis* complex): insights from genetic, morphological and acoustic data**

Keping Sun<sup>1</sup>, Rebecca T. Kimball<sup>2</sup>, Tong Liu<sup>1</sup>, Xuewen Wei<sup>1</sup>, Longru Jin<sup>1</sup>, Tinglei

Jiang<sup>1</sup>, Aiqing Lin<sup>1</sup>, and Jiang Feng<sup>1,\*</sup>

<sup>1</sup>*Jilin Provincial Key Laboratory of Animal Resource Conservation and Utilization, Northeast Normal University, Changchun, China*

<sup>2</sup>*Department of Biology, University of Florida, Gainesville, Florida, United States of America*

*\*Corresponding author. E-mail: fengj@nenu.edu.cn*

Telephone and fax number: +86-431-85099866

**Table S1** Sample information.

| Colony                         | Sampling locality               | Longitude | Latitude | Nmt | cytb<br>haplotype | control<br>region<br>haplotype | Nnc | Chd1<br>haplotype  |
|--------------------------------|---------------------------------|-----------|----------|-----|-------------------|--------------------------------|-----|--------------------|
| <b>small form (mt Clade 1)</b> |                                 |           |          | 36  |                   |                                | 35  |                    |
| <b>GD1</b>                     | Yangchun, Guangdong Province    | 111.94    | 22.44    | 1   | H1                | H1                             | 1   | H1, H20            |
| <b>GD2</b>                     | Shaoguan, Guangdong Province    | 113.56    | 24.77    | 10  | H2                | H2-H9                          | 9   | H2, H20            |
| <b>GX</b>                      | Nanning, Guangxi Province       | 108.70    | 22.82    | 5   | H3                | H10-H13                        | 5   | H2, H20            |
| <b>HuN</b>                     | Lengshuijiang, Hunan Province   | 111.57    | 27.75    | 3   | H2                | H14                            | 3   | H2, H20            |
| <b>JX1</b>                     | Jianggangshan, Jiangxi Province | 114.20    | 26.60    | 1   | H2                | H15                            | 4   | H2, H3, H20        |
| <b>YN1</b>                     | Jinning, Yunnan Province        | 102.33    | 24.50    | 4   | H4-H6             | H16-H18                        | 4   | H7, H8, H20        |
| <b>YN2</b>                     | Yuanjiang, Yunnan Province      | 102.00    | 23.59    | 7   | H7, H8            | H19- H21                       | 5   | H2, H20            |
| <b>YN3</b>                     | Baoshan, Yunnan Province        | 99.10     | 25.08    | 5   | H9, H10           | H22-H24                        | 4   | H4-H8, H20         |
| <b>large form (mt Clade 2)</b> |                                 |           |          | 22  |                   |                                | 19  |                    |
| <b>CQ</b>                      | Wulong, Chongqing City          | 107.95    | 29.27    | 2   | H11               | H25                            | 2   | H12, H18, H20      |
| <b>GD1</b>                     | Yangchun, Guangdong Province    | 111.94    | 22.44    | 6   | H12, H13          | H26, H27                       | 6   | H14-H18            |
| <b>GZ</b>                      | Xishui, Guizhou Province        | 106.21    | 28.45    | 4   | H14-H16           | H28-H31                        | 3   | H10, H11, H18, H20 |
| <b>SC</b>                      | Dazhou, Sichuan Province        | 107.74    | 31.20    | 6   | H17, H18          | H32, H33                       | 6   | H10, H11, H18-H20  |
| <b>SXi</b>                     | Hanzhong, Shannxi Province      | 107.03    | 32.84    | 3   | H18, H19          | H32-H35                        | 2   | H9, H18, H20       |
| <b>HeN</b>                     | Xichuan, Henan Province         | 111.55    | 32.87    | 1   | H19               | H36                            | 0   | —                  |
| <b>large form (mt Clade 3)</b> |                                 |           |          | 21  |                   |                                | 17  |                    |
| <b>CQ</b>                      | Wulong, Chongqing City          | 107.95    | 29.27    | 1   | H20               | H37                            | 1   | H18, H20           |
| <b>HuN</b>                     | Lengshuijiang, Hunan Province   | 111.57    | 27.75    | 5   | H21-H24           | H38-H42                        | 6   | H15, H17, H18, H20 |
| <b>JX1</b>                     | Jianggangshan, Jiangxi Province | 114.20    | 26.60    | 6   | H25, H26          | H43-H46                        | 4   | H15, H17, H18      |
| <b>JX2</b>                     | Ganzhou, Jiangxi Province       | 114.09    | 25.46    | 5   | H27, H28          | H47- H49                       | 2   | H18, H20           |
| <b>SXi</b>                     | Hanzhong, Shannxi Province      | 107.03    | 32.84    | 4   | H29               | H50                            | 4   | H9, H18            |

Nmt, the number of mitochondrial DNA sequences. Nnc, the number of nuclear Chd1 gene sequences.

**Table S2** Diversity estimates for each form. Number of individuals (N), mean allele number (A), allelic richness ( $A_R$ ), expected heterozygosity ( $H_o$ ) and observed heterozygosity ( $H_e$ ).

| <b>Taxon</b> | <b>Populations</b> | <b>N</b> | <b>A</b> | <b><math>A_R</math></b> | <b><math>H_E</math></b> | <b><math>H_O</math></b> |
|--------------|--------------------|----------|----------|-------------------------|-------------------------|-------------------------|
| large form   | GZ                 | 4.0      | 5.38     | 1.86                    | 0.86                    | 0.84                    |
|              | CQ                 | 4.0      | 5.25     | 1.87                    | 0.87                    | 0.72                    |
|              | SC                 | 6.0      | 5.75     | 1.81                    | 0.81                    | 0.77                    |
|              | SiX                | 7.0      | 5.75     | 1.78                    | 0.78                    | 0.71                    |
|              | HeN                | 2.0      | —        | —                       | 0.81                    | 0.69                    |
|              | JX1                | 5.0      | 6.00     | 1.85                    | 0.85                    | 0.83                    |
|              | JX2                | 6.0      | 6.50     | 1.86                    | 0.86                    | 0.83                    |
|              | GD2                | 6.0      | 4.38     | 1.71                    | 0.71                    | 0.67                    |
|              | HuN                | 6.0      | 6.25     | 1.85                    | 0.85                    | 0.77                    |
| small form   | HuN                | 3.0      | 3.75     | 1.80                    | 0.80                    | 0.75                    |
|              | YN1                | 4.0      | 5.13     | 1.81                    | 0.81                    | 0.81                    |
|              | YN2                | 5.0      | 5.25     | 1.80                    | 0.80                    | 0.73                    |
|              | YN3                | 5.0      | 4.25     | 1.69                    | 0.69                    | 0.58                    |
|              | GX                 | 5.0      | 4.38     | 1.74                    | 0.74                    | 0.75                    |
|              | GD1                | 9.0      | 4.38     | 1.69                    | 0.69                    | 0.71                    |
|              | GD2                | 1.0      | —        | —                       | —                       | —                       |

**Table S3** Resting frequency (RF) in echolocation calls and forearm length (FA) of the large form and small form in the *R. macrotis* complex populations from China.

| Taxon and colony                      | mRF(kHz) |        |       | FA(mm) |        |       |
|---------------------------------------|----------|--------|-------|--------|--------|-------|
|                                       | Nf/Nm    | female | male  | Nf/Nm  | female | male  |
| <b>large form (<i>mt</i> Clade 2)</b> |          |        |       |        |        |       |
| <b>CQ</b>                             | 0/2      | —      | 50.05 | 0/2    | —      | 44.84 |
| <b>GD1</b>                            | 2/4      | 52.78  | 51.66 | 2/4    | 48.21  | 46.47 |
| <b>GZ</b>                             | 0/4      | —      | 49.33 | 0/4    | —      | 45.63 |
| <b>SC</b>                             | 2/4      | 49.80  | 49.86 | 2/4    | 45.22  | 47.51 |
| <b>SXi</b>                            | 3/0      | 52.82  | —     | 3/0    | 46.71  | —     |
| <b>HeN</b>                            | 0/2      | —      | 54.44 | 0/2    | —      | 44.95 |
| <b>large form (<i>mt</i> Clade 3)</b> |          |        |       |        |        |       |
| <b>CQ</b>                             | 0/1      | —      | 49.32 | 0/1    | —      | 46.94 |
| <b>HuN</b>                            | 10/12    | 46.52  | 46.16 | 10/12  | 48.45  | 47.25 |
| <b>JX1</b>                            | 9/2      | 49.39  | 46.80 | 9/2    | 45.17  | 48.00 |
| <b>JX2</b>                            | 4/2      | 47.64  | 46.50 | 4/2    | 49.60  | 49.62 |
| <b>SXi</b>                            | 4/0      | 52.26  | —     | 4/0    | —      | 46.93 |
| <b>Small form (<i>mt</i> Clade 1)</b> |          |        |       |        |        |       |
| <b>GD1</b>                            | 0/0      | —      | —     | —      | —      | 39.57 |
| <b>GD2</b>                            | 8/3      | 69.01  | 67.79 | 12/3   | 40.12  | 38.50 |
| <b>GX</b>                             | 1/2      | 67.76  | 66.29 | 2/3    | 39.75  | 39.67 |
| <b>HuN</b>                            | 2/1      | 67.12  | 66.06 | 2/1    | 39.95  | 39.69 |
| <b>JX1</b>                            | 2/0      | 64.70  | —     | 2/0    | 39.75  | —     |
| <b>YN1</b>                            | 3/9      | 57.83  | 57.41 | 6/14   | 43.42  | 41.93 |
| <b>YN2</b>                            | 0/0      | —      | —     | 3/7    | 40     | 39.14 |
| <b>YN3</b>                            | 0/0      | —      | —     | 11/1   | 43.05  | 45    |

**Fig. S1** Phylogenetic tree based on the analysis of the mitochondrial *Cytb* of the *R. macrotis* complex. Numbers above the branches are the bootstrap support obtained in maximum likelihood and posterior probabilities from Bayesian analyses.

**Fig. S2** Phylogenetic tree based on the analysis of the mitochondrial control region of the *R. macrotis* complex. Numbers above the branches are the bootstrap support obtained in maximum likelihood and posterior probabilities from Bayesian analyses.

**Fig. S3** Output from Geneland showing assignments to clusters for  $K = 2$ . Black dots represent localities analysed in this study. In five independent runs, three runs resulted in the clusters of (a) and (b), while two runs resulted in the clusters of (c) and (d).

**Fig. S4** Phylogenetic tree based on the analysis of the mitochondrial *Cytb* of all the *R. macrotis* complex and *Rhinolophus sp1.* (EU434937). Numbers above the branches are the bootstrap support obtained in maximum likelihood analyse.

Fig. S1

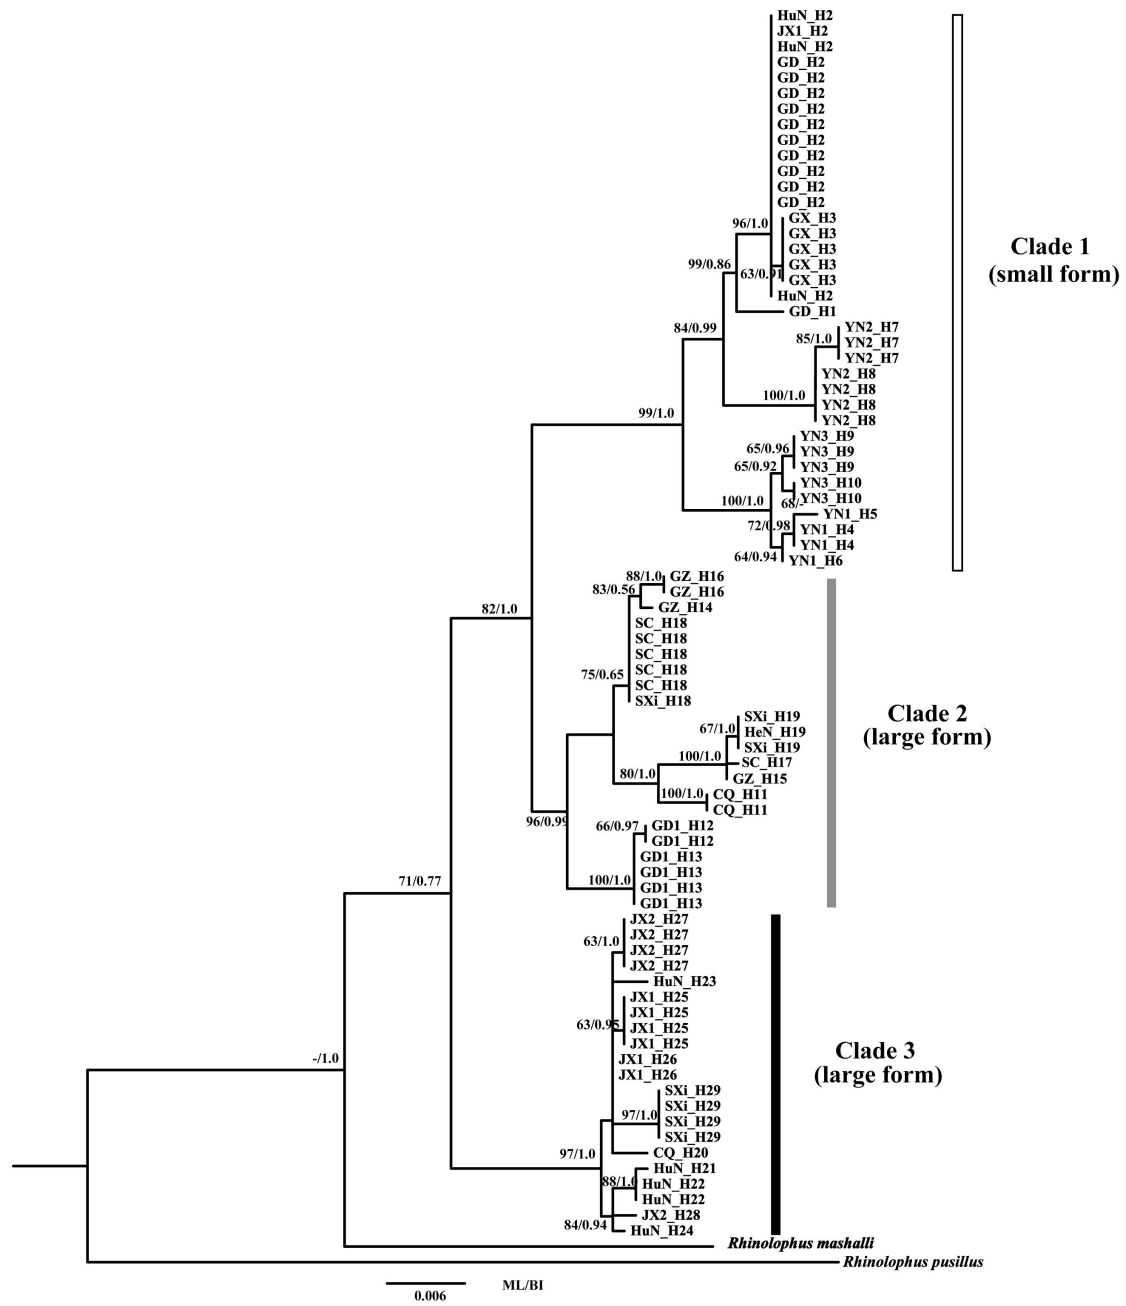

Fig. S2

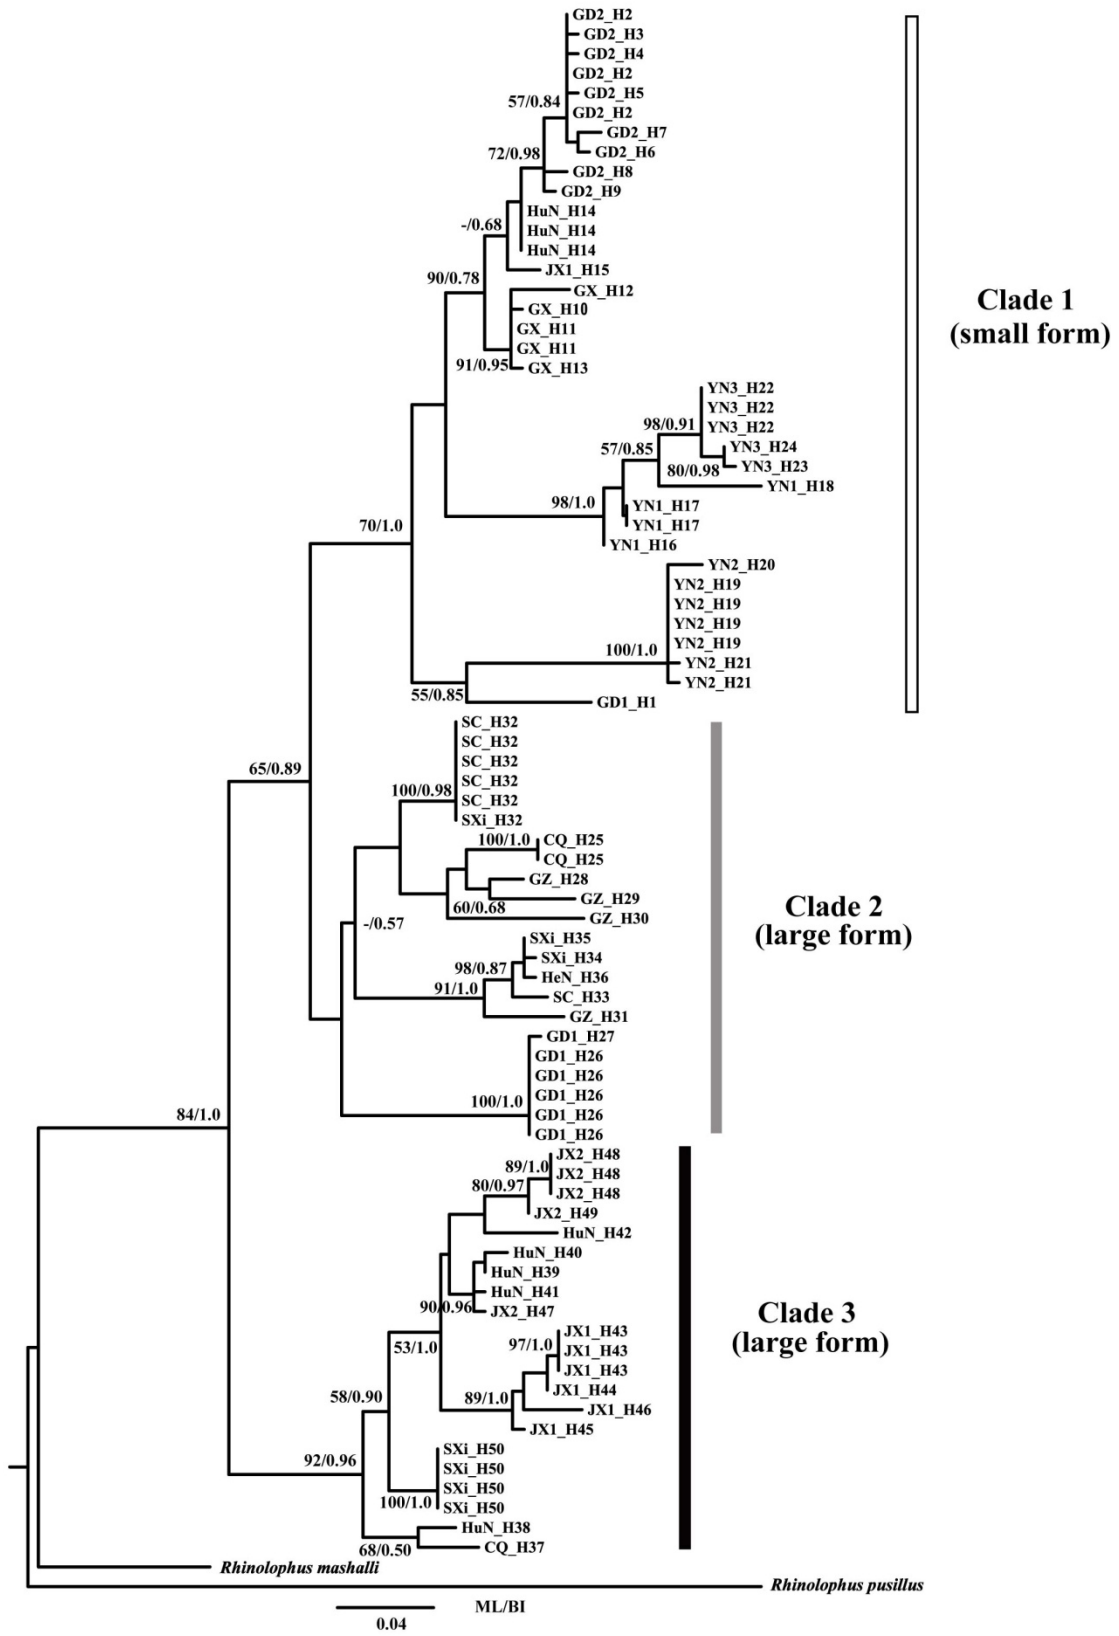

**Fig. S3**

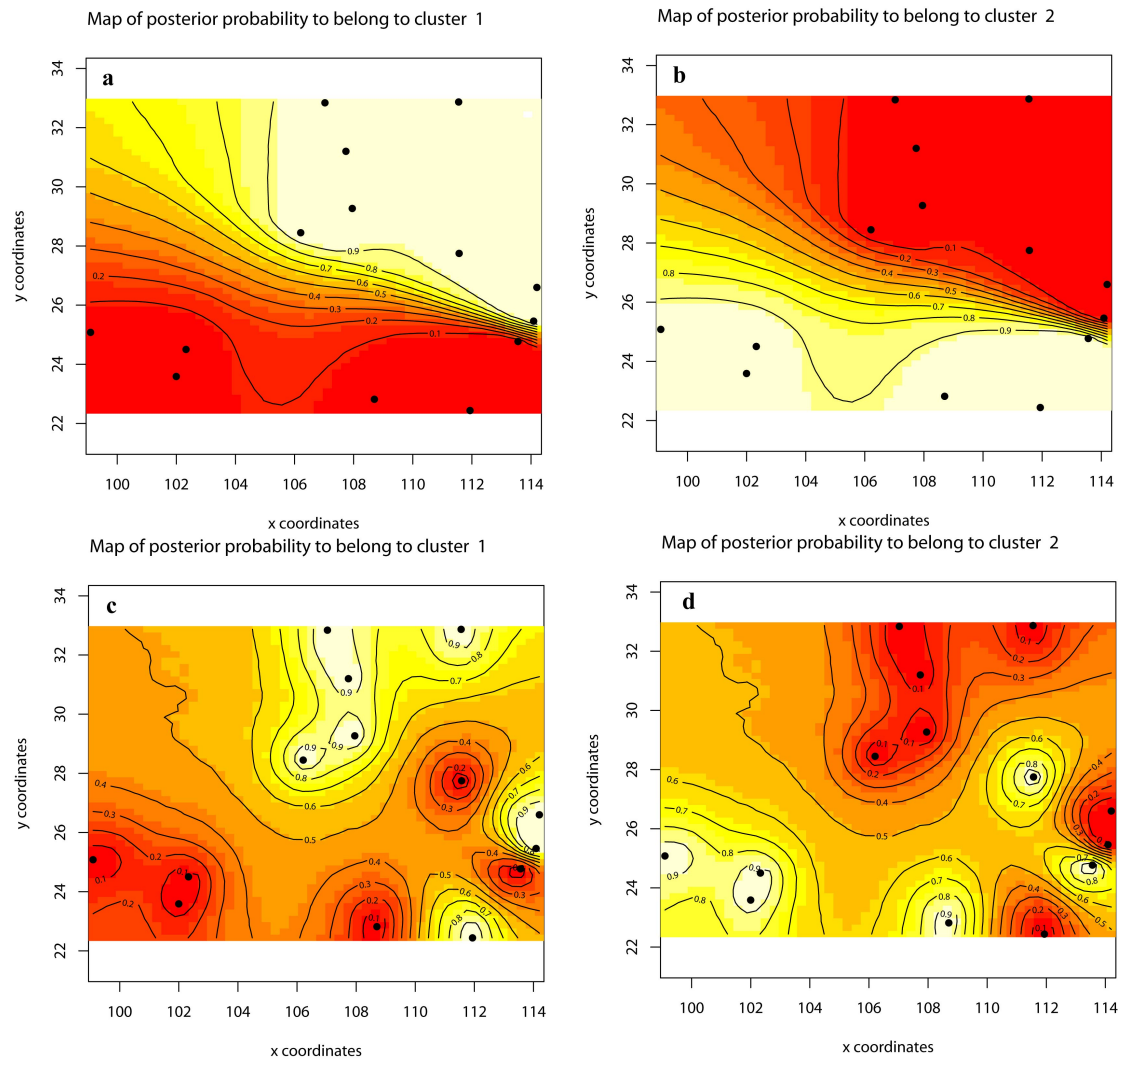

Supplement: srep35417-s1.pdf [file srep35417-s1.pdf]
